# The Genome of the Stick Insect *Medauroidea extradentata* Is Strongly Methylated within Genes and Repetitive DNA

Veiko Krauss<sup>‡a,\*</sup>, Carina Eisenhardt, Tina Unger<sup>‡b</sup>

Department of Genetics, Institute of Biology II, University of Leipzig, Leipzig, Germany

## Abstract

**Background:** Cytosine DNA methylation has been detected in many eukaryotic organisms and has been shown to play an important role in development and disease of vertebrates including humans. Molecularly, DNA methylation appears to be involved in the suppression of initiation or of elongation of transcription. Resulting organismal functions are suggested to be the regulation of gene silencing, the suppression of transposon activity and the suppression of initiation of transcription within genes. However, some data concerning the distribution of methylcytosine in insect species appear to contradict such roles.

**Principal Findings:** By comparison of *MspI* and *HpaII* restriction patterns in genomic DNA of several insects we show that stick insects (Phasmatodea) have highly methylated genomes. We isolated methylated DNA fragments from the Vietnamese Walking Stick *Medauroidea extradentata* (formerly known as *Baculum extradentatum*) and demonstrated that most of the corresponding sequences are repetitive. Bisulfite sequencing of one of these fragments and of parts of conserved protein-coding genes revealed a methylcytosine content of 12.6%, mostly found at CpG, but also at CpT and CpA dinucleotides. Corresponding depletions of CpG and enrichments of TpG and CpA dinucleotides in some highly conserved protein-coding genes of *Medauroidea* reach a similar degree as in vertebrates and show that CpG methylation has occurred in the germline of these insects.

**Conclusions:** Using four different methods, we demonstrate that the genome of *Medauroidea extradentata* is strongly methylated. Both repetitive DNA and coding genes appear to contain high levels of methylcytosines. These results argue for similar functions of DNA methylation in stick insects as those already known for vertebrates.

**Citation:** Krauss V, Eisenhardt C, Unger T (2009) The Genome of the Stick Insect *Medauroidea extradentata* Is Strongly Methylated within Genes and Repetitive DNA. PLoS ONE 4(9): e7223. doi:10.1371/journal.pone.0007223

**Editor:** Axel Imhof, University of Munich and Center of Integrated Protein Science, Germany

**Received:** March 2, 2009; **Accepted:** September 5, 2009; **Published:** September 29, 2009

**Copyright:** © 2009 Krauss et al. This is an open-access article distributed under the terms of the Creative Commons Attribution License, which permits unrestricted use, distribution, and reproduction in any medium, provided the original author and source are credited.

**Funding:** This work was supported by the Department of Genetics (Institute of Biology II, University of Leipzig). The funder had no role in study design, data collection and analysis, decision to publish, or preparation of the manuscript.

**Competing Interests:** The authors have declared that no competing interests exist.

\* E-mail: krauss@rz.uni-leipzig.de

‡a Current address: Department of Bioinformatics, University of Leipzig, Leipzig, Germany

‡b Current address: Institute of Anatomy, University of Leipzig, Leipzig, Germany

## Introduction

Variable proportions of cytosine residues in eukaryotic genomes are methylated. The percentage of methylcytosines ranges from 0–10% in insects, about 3–10% in mammals and birds, about 10% in fish and amphibians up to 50% in some plants [1,2]. DNA methylation has been associated with numerous functions, depending on the model organism and the experimental context. Molecularly, DNA methylation in animals and plants is associated with the inhibition of initiation of transcription [3]. In contrast, some fungi seem to use DNA methylation to inhibit the elongation of transcription [4].

Although there have been many studies on DNA methylation, to establish its primary role that has led to its widespread distribution in higher organisms has proved to be controversial. It might be the suppression of activity of transposable elements [5,6]. It has also been proposed that DNA methylation primarily acts to stabilize patterns of endogenous gene activity by maintaining gene

silencing that was build by other means [7]. This could be used to transmit determined and differentiated states in cell lineages [8]. Third, it was suggested that DNA methylation located inside of transcription units of animals and plants could prevent spurious internal initiation of transcription [9,10].

To understand DNA methylation, insects appear to be especially revealing. The available data demonstrate widely varying levels of methylation in several insect species belonging to various orders and do not seem to indicate any conserved biological function [2]. At first glance, in some insect species DNA methylation plays only a minor role or appears not to silence genes but to keep them in activity [2]. Methylation of transposons could only be shown for *Drosophila* [11], but not for other methylated insect genomes [12]. So, insects might represent a group of animals where DNA methylation occurs only spuriously, is distributed differently and has biological functions unrelated to those found in other metazoans. However, this impression may vanish if species would be found that show more familiar patterns of DNA methylation.

To find such species, we compared insects with angiosperms and vertebrates, which show the highest levels of DNA methylation. Both groups contain rather big multicellular organisms with large genomes, a high cell turnover during a long individual lifetime and, correspondingly, relatively low population sizes. Such conditions facilitate cytosine methylation irrespective of the resulting cytosine hypermutability, that is, the especially high rate of mutation of methylcytosine to thymine [13]. On the other hand, DNA methylation is a mutational burden [14] that will be selected against in organisms which have (1) less need for methylation because of relatively short transcription units (correlated with small genome sizes) and a low cell turnover during development [8] and (2) a large population size facilitating selection. These conditions are more or less fulfilled in insects that have already been analyzed for DNA methylation (e.g. fruit flies, mosquitos, butterflies, bees, aphids and mealy bugs), so it is conclusive that strongly methylated genomes could not be found here.

A group of insects with rather large genome sizes – 2 to 8 pg per haploid genome, which come close second to orthopterans – are walking sticks (Phasmatodea) [15]. This group contains the largest species of insects and constitutes an independent lineage since about 300 million years [16]. Walking sticks often reproduce parthenogenetically which should result in especially low effective population sizes as well as in high cell turnover in relation to other insects. They need a long time, typically several months, for development also in tropical habitats. To our knowledge, DNA methylation has not been evaluated yet in these insects. Thus, we decided to analyze the occurrence and distribution of methylcytosine in the Vietnamese Walking Stick, *Medauroidea extradentata*.

By comparison of digestion patterns produced by a pair of restriction enzymes showing different sensitivity against methylcytosine, we demonstrate that two species of walking sticks have a strong, genome-wide CpG methylation. We isolated methylated DNA fragments from *M. extradentata* and learned that most of the corresponding sequences are repetitive. Bisulfite sequencing of one of these fragments and of parts of a conserved protein-coding gene revealed a methylcytosine content of 12.6%, mostly found at CpG, but also at CpT and CpA dinucleotides. In addition, the alignment of orthologous sequences from different genomes demonstrates that the depletion of CpG and the corresponding enrichment of TpG and CpA dinucleotides inside of protein-coding genes reaches a similar degree as in vertebrates and reveals a history of CpG methylation in the germline of these insects. Therefore, we suggest that in stick insects DNA methylation has similar functions as in vertebrates.

## Results

### Detection of methylation by differential digestion

We started our analysis with a comparative digestion of genomic insect DNA using the restriction enzymes MspI and HpaII. Both enzymes are isoschizomers that recognize the target sequence 5'-CCGG-3', but only HpaII is inhibited by methylation of the inner cytosine of this sequence. If the digestion pattern of HpaII is shifted to higher molecular weights in relation to the MspI pattern, the corresponding genome contains mCpG (methylcytosine, followed by a guanine). The genomic DNA of two walking sticks (*Sipylodea sipylus* and *Medauroidea extradentata*) clearly showed such a difference (Figure 1), while DNA of *Drosophila melanogaster* (Diptera), *Bombyx mori* (Lepidoptera) and *Apis mellifera* (Hymenoptera) was equally digested by MspI and HpaII. We note that for *Apis* and *Bombyx* CpG methylation was shown [17,18], but the fraction of methylated CpG is probably rather low in both species.

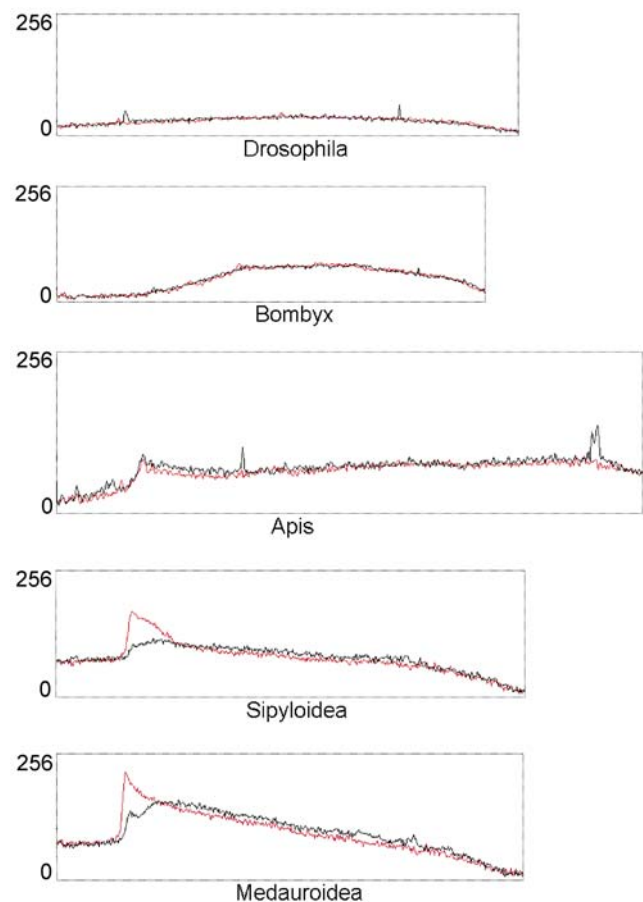

**Figure 1. MspI/HpaII restriction analysis of selected insect species.** Equivalent amounts of insect genomic DNA were digested with MspI (black line) and HpaII (red line) and separated at adjacent lanes of an agarose gel. The ethidium bromide signals of both lanes were plotted in different colors into one plot. Results are shown for *Drosophila melanogaster*, *Bombyx mori*, *Apis mellifera* and the walking sticks *Sipylodea sipylus* and *Medauroidea extradentata*. doi:10.1371/journal.pone.0007223.g001

A second pair of isoenzymes, MboI and Bsp143I, was used to detect a possibly general cytosine methylation irrespective of the nucleotide downstream of methylcytosine. Both enzymes are isoschizomers that recognize the same target sequence 5'-GATC-3', but only Bsp143I is inhibited by methylation of the cytosine within this sequence [19]. In addition, we used the methylation-specific enzyme McrBC, which recognizes 5'-RmC(N<sub>40-3000</sub>)RmC-3' sites. We found no obvious differences between the digestion patterns of MboI and Bsp143I, which argues against a significant non-CpG methylation (Figure 2). The McrBC digestion of *Medauroidea* DNA resulted in an evenly distributed smear and a strong undigested band. In contrast, *Drosophila melanogaster* DNA stayed essentially undigested, and the human DNA was more completely digested. Based on these results, we suggest that *Medauroidea extradentata* has a significant DNA methylation, which is mainly found at CpG sites at some regions of the genome, whereas other regions are only weakly or not methylated.

To isolate methylated fragments of *M. extradentata* DNA, we eluted the DNA peak of the HpaII lane located at the higher molecular weight boundary of the separation area, digested the elution with Bsp143I and cloned the resulting fragments (Materials and Methods). 39 fragments were selected (1) to contain at least one internal HpaII or Bsp143I restriction site and (2) to be larger than 200 bp, and were

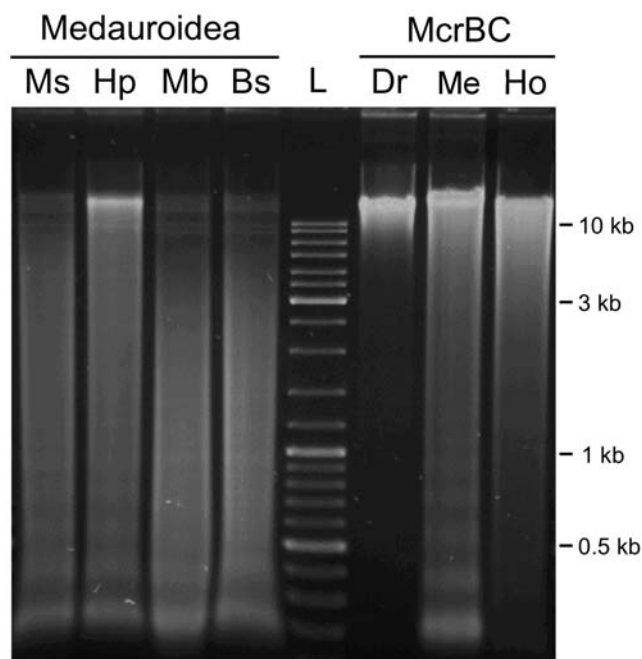

**Figure 2. Differential restriction analysis of *Medauroidea extradentata*.** Equivalent amounts of genomic DNA were digested and analyzed using MspI (Ms), HpaII (Hp), MboI (Mb), Bsp143I (Bs) and McrBC. For comparison, equivalent genomic digestions using McrBC and DNA from *Drosophila melanogaster* (Dr), *Medauroidea extradentata* (Me) and *Homo sapiens* (Ho) are shown. The track labelled L contains GeneRuler® Ladder Mix (Fermentas).  
doi:10.1371/journal.pone.0007223.g002

sequenced. Omitting doublets and bacterial contaminations, we ended up with 23 sequences containing supposedly methylated cytosines in 5'-CCGG-3' (HpaII) or 5'-GATC-3' (Bsp143I) restriction sites. According to a BLAST analysis, none of these 23 sequences contains a significantly conserved part of a gene.

Out of these clones, 10 larger fragments with at least one HpaII site (615 to 2526 bp, accession numbers FM985962-FM985971) were evaluated by Southern blot for methylation of the inner cytosine of 5'-CCGG-3' and for uniqueness within the *Medauroidea* genome (for two examples, see Figure 3). All 10 fragments were shown to be, at least in part, methylated. Nine of these 10 fragments are repetitive, as demonstrated by strong and diffuse hybridization signals in EcoRI, BamHI and HindIII lanes (Figure 3). The frequent incompleteness of methylation might be due to (1) differential methylation of different copies in all cells and/or (2) differential methylation of the same genomic copies in different tissues. In summary, 14 out of 23 fragments are repetitive, as shown by Southern Blot (9), internal repeats (6), and/or by BLAST analysis (6). Typical satellite sequences, consisting of multiple tandem repeats, were not identified. Interestingly, best BLAST hits revealed that 4 fragments contained remnants of reverse transcriptase genes. Three of these fragments (5–27, 7–29 and 7–41) were used as Southern probes. All revealed an incomplete methylation of the 5'-CCGG-3' sites. Two other, not further evaluated fragments correspond, according to BLAST hits, to a DNA transposase gene or to a pseudogene, interrupted by several translation stops, of phospholipase c beta.

### Bisulfite sequencing

Next, we undertook bisulfite sequencing experiments to obtain (1) the abundance of methylcytosine and (2) the nucleotides

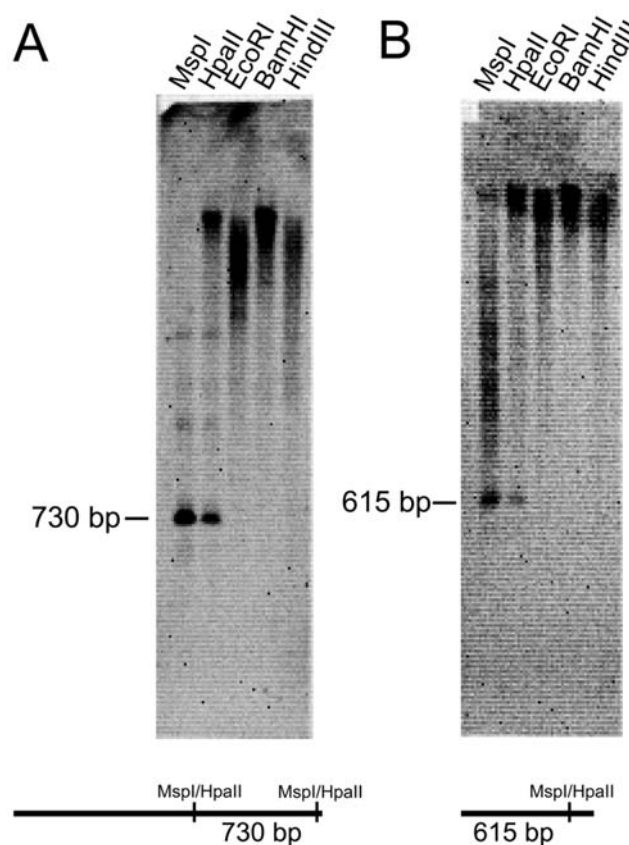

**Figure 3. Southern blots showing methylation and repetitivity of selected DNA fragments.** Both blots contain five enzyme lanes. CpG methylation is demonstrated by a partial signal shift from lower (MspI lane) to higher molecular weights (HpaII lane). The existence of more than two signals in the lanes may be due to restriction site variability between different copies of the repetitive sequences or due to methylation of the outer cytosine of some MspI sites, which renders such sites resistant to MspI. (A) The 730 bp signal corresponds to the expected internal MspI/HpaII fragment as shown below for the 1862 bp fragment 3–20 (FM985962). (B) The 615 bp signal may correspond to the longer MspI/HpaII fragment of the 835 bp fragment 5–11 (FM985964).  
doi:10.1371/journal.pone.0007223.g003

adjacent to methylcytosines in selected sequences. Sodium bisulfite reverts cytosines to uracils, but leaves 5mC unchanged. Thus, methylcytosines could be identified by sequencing of bisulfite PCR clones (Materials and Methods). Initially, we used one fragment which has been confirmed to be methylated and contained a remnant of a reverse transcriptase gene (7–29, 2216 bp, accession number FM985968). However, only 4 bisulfite clones could be obtained from this repetitive sequence. Therefore, we additionally analyzed subfragments of three protein-coding genes (for isolation see below). Together, 64 bisulfite clones were sequenced from these genes (Table 1). Including the retrotransposon sequences, we obtained 14616 bp sequence containing 2851 (19.5%) cytosines.

Remarkably, the fragments corresponding to the retrotransposon, the phosphatase 2a gene and the eIF2 $\gamma$  gene showed similarly strong signals of methylation. 15.8% of all cytosines and 94.6% of the CpG positions were methylated in these 47 clones. Clones from sense and antisense strands of the phosphatase gene showed no differences. In stark contrast, all 17 histone H3 clones were only weakly methylated (4% of all cytosines and 8% of the CpG positions). Intriguingly, the amount of CpT and CpA methylation

**Table 1.** Bisulfite sequencing.

|                                           | Accession number | Bisulfite clones                      | mCs                 | mCpGs              |
|-------------------------------------------|------------------|---------------------------------------|---------------------|--------------------|
| 7–29 (contains retrotransposon sequences) | FM985968         | 4 (255 bp)                            | 39 of 196 (20%)     | 38 of 40 (95%)     |
| Phosphatase 2a gene fragment              | FM985961         | 10 (245 bp), 11 (240 bp), 12 (219 bp) | 238 of 1513 (16%)   | 184 of 197 (93%)   |
| eIF2 $\gamma$ gene fragment               | FN395317         | 10 (334 bp)                           | 51 of 368 (14%)     | 40 of 40 (100%)    |
| Histone H3 gene fragment                  | AY125256         | 17 (151 bp)                           | 30 of 774 (4%)      | 18 of 203 (8%)     |
| $\Sigma$                                  |                  | 14616 bp                              | 358 of 2851 (12.6%) | 280 of 480 (58.3%) |

doi:10.1371/journal.pone.0007223.t001

was found to be similar as in all other bisulfite clones. Together, 3.9% of the CpT positions and 3.7% of the CpA positions are methylated (Figure 4). Thus, we detected a cytosine methylation which is nearly complete at CpG sites in two single-copy, protein-coding genes and in a transposon-derived sequence, while clones from the multi-copy histone H3 genes show a significantly lower level of CpG methylation.

### CpG depletion argues for germline methylation

As cytosine methylation was primarily found at CpG positions, we wondered if this might have been influenced dinucleotide abundances in the *Medauroidea* genome. A depletion of CpG dinucleotides is specifically found in organisms showing high (e.g. vertebrates) or moderate (e.g. echinoderms and tunicates) degrees of CpG methylation [13]. The most convincing explanation of a genome-wide or regional CpG depletion is the high disposition of methylcytosine to mutate via deamination to thymine [20]. If correction of the resulting T/G mispairing fails, affected CpG dinucleotides will convert in half of cases to TpG (same strand) or CpA (opposite strand). Thus, CpG depletion and a corresponding TpG and CpA enrichment are signatures of methylation occurring in the germline.

To analyze dinucleotide abundances in *M. extrudentata*, we collected nuclear DNA sequences from different sources. First, we used 30 sequences originating from the elution of DNA undigested

by HpaII, i.e., 23 putatively methylated sequences which were collected as described above and, in addition, 7 sequences which did not contain MspI sites and/or which were shorter than 200 bp. 15 of these sequences were repetitive as shown by Southern blot, internal repeats, and/or by BLAST analysis. Second, we cloned and sequenced fragments from 4 strongly conserved genes (eIF2 $\gamma$ , phosphatase 2a, chromatin assembly factor 1 and casein kinase II; accession numbers FM985958–FM985961) using degenerate primers designed for a phylogenetical project (Eisenhardt and Krauss, unpublished). Third, we added sequences of three already known nuclear genes (Histone H3, 18S rDNA, 28S rDNA; AY125256, AY121173, AY125313) [21].

In summary, we analyzed 37 DNA fragments with a cumulative length of 27256 bp (Table 2). Together, these sequences are 11% depleted of CpG and 9.5% enriched on TpG+CpA, if compared with the expected abundances derived from the frequencies of the corresponding single nucleotides. These significant deviances are based on the stronger effects of CpG methylation found in the protein-coding and the repetitive classes of sequences (Table 2). In contrast, the RNA genes show a nearly opposite bias, which might be due to strong selection concerning almost all nucleotides.

To compare the extent of methylation in *Medauroidea* and other metazoans, we used the strong conservation of all 5 analyzed coding gene fragments and collected orthologous fragments from genome project data (Table 3). Significant overrepresentations of TpG and CpA and significant underrepresentations of CpG were found for 3 of the analyzed insects (for *Medauroidea extrudentata*, the pea aphid *Acyrtosiphon pisum* and the honey bee *Apis mellifera*). All three species show a mainly CpG-oriented cytosine methylation [18,22]. The strongest hypermutation bias of the compared genes was found in *Medauroidea*, which is even slightly stronger than in the corresponding human and murine genes. Therefore, mutational pressure by CpG methylation has similarly strongly influenced some coding gene sequences in *Medauroidea* as in vertebrates.

### Discussion

Insects show much less and differently distributed DNA methylation than other metazoans [2]. This is consistent with the finding that in metazoans the amount of DNA methylation is negatively correlated with population sizes and positively with the amount of cell turnover [8]. Walking sticks (Phasmatodea) possess, unlike other insects, low population sizes and high cell turnovers during development. Thus, we analyzed the occurrence and distribution of methylcytosine in the walking stick *Medauroidea extrudentata* to evaluate whether they show, conclusively, stronger DNA methylation than other insects.

By comparing differential digestions, we demonstrated a genome-wide, mostly CpG-specific methylation in *Medauroidea* and in the related walking stick *Sipylodea sipylus*. Prominent, undigested bands combined with smears of relatively low

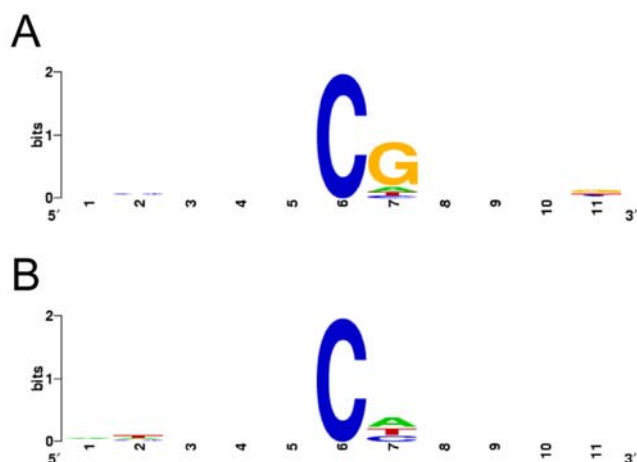

**Figure 4. Sequence context of cytosine methylation in *Medauroidea*.** Logos of sequence contexts were obtained from aligned 11-mer sequences in which the methylcytosine was in the sixth position. (A) All 358 11-mers were analyzed. (B) Sequences were restricted to the 77 methylcytosines in non-CpG contexts. The maximum sequence conservation per site is 2 bits, whereas 0 bit means that there is no preference for any nucleotide. doi:10.1371/journal.pone.0007223.g004

**Table 2.** Relative dinucleotide abundances (observed/expected) in different sequence classes of the *Medauroidea extrudentata* genome.

| Sequence class                  | Fragments | bp    | G+C% | CpG     | TpG     | CpA     |
|---------------------------------|-----------|-------|------|---------|---------|---------|
| Protein-coding genes            | 5         | 2525  | 47.4 | 0.59*** | 1.28*** | 1.31*** |
| Repetitive DNA                  | 15        | 14788 | 38.4 | 0.76*** | 1.17*** | 1.17*** |
| Unclassified DNA                | 15        | 5885  | 40.8 | 0.97    | 1.13**  | 1.02    |
| 28S and 18S ribosomal RNA genes | 2         | 4058  | 56.5 | 1.10*   | 0.97    | 0.75*** |
| $\Sigma$                        | 37        | 27256 | 42.4 | 0.89*** | 1.11*** | 1.08*** |

Stars mark significant deviances from the expected relation (1.00) according to a two-sided, exact test.

\*0.05 $\geq$ p>0.01.

\*\*0.01 $\geq$ p>0.001.

\*\*\*0.001 $\geq$ p.

doi:10.1371/journal.pone.0007223.t002

molecular weight as obtained in the HpaII lane from *Medauroidea* and *Sipylodea* DNA were not found for aphids, mealy bugs, butterflies or *Drosophila*, but for example in digestions made from *Ciona* DNA [23]. The methylcytosine-specific enzyme McrBC exhibits a very similar restriction pattern for *Medauroidea* DNA, which also supports regional clustering of methylated and unmethylated DNA. We suggest, therefore, that walking sticks have a clustered, mosaic-type DNA methylation pattern similar to that of invertebrate chordates [24].

We isolated DNA fragments accumulated in the undigested part of the HpaII restriction and cloned 23 putatively methylated

sequences that did not contain any recognizable fragments of functional genes. We confirmed methylation for 10 of these fragments by hybridization and showed that 9 of these 10 reevaluated sequences are repetitive. Therefore, the majority of the isolated sequences appears to be repetitive, which was supported by different means in 14 of 23 cases. Methylcytosines inside of repetitive and transposon-like sequences indicate a possible involvement of DNA methylation in the suppression of transposition. Functional transposons of walking sticks are not yet known, so we cannot test at this stage whether transposons are silenced by cytosine methylation. This is an attractive direction for subsequent work.

Furthermore, we demonstrated by bisulfite sequencing that, within the independently isolated fragments of two single-copy coding genes and of one fragment of the repetitive sequences mentioned above, 15.8% of all cytosines are methylated. CpG positions inside these fragments were nearly completely methylated (94.6%). In contrast, bisulfite clones from a multi-copy gene, histone H3, showed only weak CpG methylation (8%). This should be interpreted carefully as other gene copies might be strongly methylated. Interestingly, the non-CpG methylation appeared not significantly lower than in the other analyzed fragments.

In summary, 280 out of the 358 methylcytosines were followed by a guanine downstream. Also CpT (32, 3.9%) and CpA (33, 3.7%) dinucleotides seem to get occasionally methylated, while 14 methylcytosines followed by another cytosine represent only 2.3% of all CpC positions and might be, therefore, artifacts of incomplete bisulfite conversion or PCR mutations [25]. Consistently, the MspI lane of the Southern blots revealed no evidence for or against CpC methylation within 5'-CCGG-3' sites in *Medauroidea* (Figure 3).

A similar quantitative relationship of dominant methylation of CpG (90%), weak methylation of CpA (2.4%) and CpT (0.7%) and no methylation of CpC (0%) dinucleotides was found in murine embryonic stem cells [26]. In contrast, *Drosophila* shows mainly methylation in a CpT or CpA context [27]. In the mealy bug *Planococcus lilacinus*, methylcytosine appears to occur nearly independently of the identity of the 3' nucleotide [28,29]. Thus, the sequence context of *Medauroidea* DNA methylation seems to be more similar to that of vertebrates than to that of mealy bugs or *Drosophila*. In vertebrates, both CpG and non-CpG methylation is dependent on Dnmt1 and/or Dnmt3a/b activity [26,30,31], while methylation is catalyzed exclusively by Dnmt2 in *Drosophila* [26]. Therefore, it will be interesting to see in the future if CpG and non-CpG methylation of *Medauroidea* differ in their

**Table 3.** CpG, TpG and CpA dinucleotide abundances (observed/expected) in different metazoan genes.

| Organism           | CpG            | TpG            | CpA            |
|--------------------|----------------|----------------|----------------|
| Danio              | 0.53***        | 1.37***        | 1.36***        |
| Nematostella       | 0.56***        | 1.33***        | 1.25**         |
| <b>Medauroidea</b> | <b>0.59***</b> | <b>1.28***</b> | <b>1.31***</b> |
| Homo               | 0.60***        | 1.22**         | 1.16*          |
| Mus                | 0.62***        | 1.29***        | 1.26**         |
| Strongylocentrotus | 0.63***        | 1.11           | 1.27***        |
| Ciona              | 0.66***        | 1.23**         | 1.20**         |
| Apis               | 0.72*          | 1.22**         | 1.17*          |
| Acyrtosiphon       | 0.75**         | 1.33***        | 1.19*          |
| Pediculus          | 0.79*          | 1.12           | 1.17*          |
| Nasonia            | 0.82*          | 1.10           | 1.18*          |
| Drosophila         | 0.92           | 1.34***        | 1.15*          |
| Daphnia            | 0.94           | 1.09           | 1.08           |
| Aedes              | 1.03           | 1.17*          | 1.16*          |
| Bombyx             | 1.05           | 1.05           | 1.00           |
| Caenorhabditis     | 1.12           | 1.00           | 0.98           |
| Anopheles          | 1.15*          | 1.15           | 1.06           |
| Tribolium          | 1.19*          | 0.99           | 1.00           |

Orthologous fragments of 5 strongly conserved, protein-coding genes were used. The species are ordered according to CpG depletion. The lengths of the analyzed sequences lie between 1846 and 3989 bp. Stars mark significant deviances from the expected relation (1.00) according to a two-sided, exact test.

\*0.05 $\geq$ p>0.01.

\*\*0.01 $\geq$ p>0.001.

\*\*\*0.001 $\geq$ p.

doi:10.1371/journal.pone.0007223.t003

enzymatic origin. The similar level of CpG and non-CpG methylation specifically in the histone H3 gene fragment argues in favor of a division of labor between different enzymes.

Motivated by the otherwise strong preference for CpG methylation, we evaluated the depletion of CpG and the enrichment of TpG and CpA dinucleotides caused by CpG hypermutation in *Medauroidea* sequences. We demonstrated that in evolutionary conserved coding genes, *Medauroidea* appears to be equally strongly methylated at CpG positions as vertebrates (Table 3). Interestingly, in repetitive sequences this signature is somewhat weaker (Table 2), distinct from the situation in vertebrates. Simmen [20] reports a depletion of CpG in whole mammalian genomes (dominated by repetitive sequences) to about 20% of the expected amount. While we detected methylated repetitive sequences in *Medauroidea*, here the amount of methylation seems to be higher within conserved coding genes if estimated according to the CpG hypermutation effect. Such a counterintuitive preferential methylation of the bodies of active genes was suggested to inhibit the initiation of transcription inside of genes [32] and was first reported for the aphid *Myzus persicae*, where DNA methylation is positively associated with the activity of amplified esterase gene copies [33]. Similarly, in *Apis* DNA methylation was also found primarily within genes, not at their 5' or 3' ends [18]. This accumulation of CpG methylation within active transcription units is not limited to insects. In humans, especially bodies of highly active genes are strongly methylated [34,35], Suzuki et al. [36] identified DNA methylation preferentially within genes of *Ciona intestinalis*, and also in *Arabidopsis* active gene bodies are significantly stronger methylated than their 5' or 3' ends [37]. Thus, preferential methylation of gene bodies seems to be a general phenomenon in animals and plants.

In conclusion, both suppression of transposon activation and suppression of disturbing initiations of transcription inside of genes could be functions of DNA methylation that correspond to the detected distribution of methylcytosine in *Medauroidea*. In concordance with a quantitative shift of distribution, its function within coding genes probably has become more prevalent during the evolution of walking sticks as compared to other insects. A role of cytosine methylation for inactivation of transposons might have been maintained only in some insects such as *Drosophila* [11] and possibly *Medauroidea*, but not in others such as aphids and coccids [22,38]. Thus, *Medauroidea* confirms our initial expectation that animals with low effective population sizes and high amounts of cell turnover should frequently methylate cytosines as vertebrates do. In walking sticks, DNA methylation may play, therefore, an important role for the regulation of gene activity during development [8]. This could be proved by analysis of promoter methylation of differentially expressed candidate genes.

## Materials and Methods

### Insect specimens used

*Apis mellifera* (honey bee) was trapped in the vicinity of Leipzig (Saxony, Germany). For *Drosophila melanogaster*, a wild type strain from the laboratory was used. *Bombyx mori* (silk worm) was used from commercial stocks. Parthenogenetically reproducing strains of the walking sticks *Sipyloidea sipyilus* and *Medauroidea extradentata* were reared on blackberry leaves. Before DNA isolation, the complete intestinal tract was removed to avoid contamination with plant and bacterial DNA.

### Digestions, cloning and Southern blot

DNA was isolated by standard protocols. Digestion using MspI, HpaII, MboI, Bsp143I (all from Fermentas) and McrBC (New

England Biolabs) has been performed according to the conditions required by the supplier at 37°C for 16 h using 1 U/μg DNA at least three times independently using the same DNA preparations for all enzymes. Applying the programs Object Image and Graphic Converter, a two-color-plot was made from the intensity of ethidium bromide fluorescence of MspI/HpaII digested probes running side by side at a 0.8% agarose gel. For cloning of methylated DNA fragments, the band of highest molecular weight in the HpaII lane was excised from a 1.0% low melting agarose gel, heated 10 min at 70°C and supplemented immediately with Bsp143I and restriction buffer for overnight digestion. The resulting fragments were isolated using glass milk, cloned in a pBSII vector (Stratagene) linearized with BamHI and sequenced. Sequencing was performed on ABI 3100 equipment using BigDye Sequencing Chemistry (ABI). For sequence analyses, MacVector 7.2 (Accelrys) was used. Southern blots were made using 20 μg DNA and the Vaku-Blot system (Biometra). Probes were generated by PCR from pBSII-cloned insert sequences, tagged with alkaline phosphatase and, applying materials and protocols of the Gene Image AlkPhos Direct Labeling and Detection system (Amersham Biosciences), used for hybridization and detection via luminescence.

### Bisulfite sequencing

Genomic DNA of *M. extradentata* was treated with sodium bisulfite using the EZ DNA Methylation Gold Kit (Zymo Research). The amplification of the anti-sense-strang-specific subfragment of the repetitive DNA fragment 7–29 was done applying the primer pair Bac7-29-B1 (5'-GTTTTTTRCCACAA-CAARC-3') and Bac-7-29-B3 (5'-GGAYTAAAYTTTATYTA-TYA-3') for two successive PCRs. A control experiment at *Drosophila melanogaster* DNA, performed in parallel, resulted in a conversion of 169 out of 170 cytosines to thymine.

Sense-strand-specific subfragments of the phosphatase 2a fragment were amplified applying the primer pair Bex6512-A1 (5'-CATGGAGGATTTTTTTTATTTA-3') and Bex6512-A2 (5'-ATCACACATAAAACCCTACAAC-3') for first PCR, primer pairs Bex6512-A1 and Bex6512-A3 (5'-TATCATAATC-TAAAAACCTTAC-3') for the 245 bp subfragment and the primer pairs Bex6512-A2 and Bex6512-A4 (5'-ATGTTTTGA-GAGATTTAATTTTG-3') for the 240 bp subfragment to generate nested PCRs based on the first PCR product. The amplification of the anti-sense-strang-specific phosphatase 2a subfragment of 219 bp was done using the primer pair Bex6512-B1 (5'-CATAAAAACTTTCTCCATCCA-3') and Bex6512-B2 (5'-ATAGTAGGTTATATATGGGATTTTG-3') for first PCR and the primer pair Bex6512-B1 and Bex6512-B3 (5'-GGAATAGATAATAATAAAATGTTG-3') for nested PCR. A 333bp fragment of the eIF2γ gene were amplified applying the primer pair Mex289-A1 (5'-AGTAGGTGGTAGTGTTTT-TYG-3') and Mex289-A2 (5'-AAAACCTAACCTAACCR-TACC-3') for first PCR, and the primer pair Mex289-A3 (5'-TTTYGAGGTGTGTTTAAGG-3') and Mex289-A4 (5'-AAC-TAACCTAACCTAACCTC-3') for a nested PCR. A 151bp fragment of the histone H3 gene were amplified using the primer pair Mex-H3-A2 (5'-TTAATATCCTCAAACAATCCC-3') and Mex-H3-A3 (5'-YGAYGGGAGGTAAAGTTT-3') for first PCR, and the primer pair Mex-H3-A4 (5'-CAATCCCACCAAA-TAAACC-3') and Mex-H3-A5 (5'-YGTTATAGGTTTGGTA-TYGTYG-3') for a subsequent nested PCR and a reamplification of the product.

In all experiments on gene fragments, we used undegenerated nucleotide positions assuming completely converted cytosines (or guanines on the antisense strand) at non-CpG positions to ensure

that only completely converted DNA fragments would be amplified. PCR fragments were cloned in pJET1.2 vectors (Fermentas) and sequenced. MacVector 7.2 (Accelrys) was used for sequence alignment of converted and unconverted fragments. Consensus sequences for cytosine methylation were generated using Weblogo 2.8.2 [39].

### Analysis of dinucleotide abundances

For analysis of dinucleotide abundances, we used MacVector 7.2 (Accelrys). Degenerate primers based on conserved amino acid sequences surrounding evolutionarily shifted intron positions (NIPs) [40] were used to amplify parts of 3 genes encoding phosphatase 2a, chromatin assembly factor 1 and casein kinase II, respectively, from *Medauroidea* genomic DNA via nested PCR. For phosphatase 2a, we used 6512-1 (5'-ACCCAAGTTTACGGTTTAYGAYGARTG-3') and 6512-4 (5'-AATGTCCTGACCGAAGTRTAICIGCICC-3') for the first PCR and 6512-2 (5'-ACGGCGCTCGTCGATGGICARATHTTGTG-3') and 6512-3 (5'-AATACCC-CAGCCCCICKRTRTCIGGRTG-3') for the nested PCR. For casein kinase II, we used 8971-1 (5'-AAGAAGAAAAT-TAAAMGIGARATHAARAT-3') and 8971-4 (5'-ATTATCATGGCCATGRAARAAGGYTCYTT-3') for the first PCR and 8971-2 (5'-GAACACGTCAATAACACIGAYTTTAAARCA-3') and 8971-3 (5'-ATTGTATTCTTGTCCIGGRTGRTARAAYTC-3') for the nested PCR. For chromatin assembly factor 1 (CAF-1), we used 4191-1 (5'-CACAAGGATGAGATTTTTCARGTICARTGG-3') and 4191-4 (5'-ATTCTCGGCCATTTGCCAACYTG-CATDAT-3') for the first PCR and 4191-2 (5'-TGGGATTTGAGCAAAATHGGIGARGARCA-3') and 4191-3 (5'-CAGG-AAACAAATAACCCAAGGYTCRTTIGG-3') for the nested

PCR. For the 4th gene, eIF2gamma, Trizol reagent (Invitrogen) was used to isolate total RNA. cDNA was synthesized using Hminus-M-MLV reverse transcriptase (Fermentas) and a polyT primer. RT-PCR was performed using the primers EFdeg6-2 (5'-TTTGTACCAACACCDATHARDCCICCG-3') and EFdeg7 (5'-CCNGGNCAYGAYATHYTNATGGCIACIATG-3') in the first and the primers EFdeg6-2 and EFdeg3 (5'-GAR-CAYTTRGCSGCYATHGARATHATG-3') in the second round. A sequence of 450 bp was obtained, which was prolonged to 1011 bp after 5'RACE (rapid amplification of cDNA ends) using the additional primer BacEF1 (5'-GCAAAGAGGGAAA-CAATGC-3'). All PCR products were cloned in pJET1.2 (Fermentas) for sequencing. Orthologous gene sequences from selected metazoans were retrieved from NCBI using tBLASTn. The orthology of these candidate sequences was verified by reciprocal BLAST analysis.

### Acknowledgments

We would like to thank J. Johnke and C. Schmidt for help in bisulfite sequencing and dinucleotide abundance analysis, S. Petter for skillful technical support and G. Reuter and J. Lehmann for critical reading of the manuscript. We gratefully acknowledge the sequencing of the yet unpublished genomes of *Danio rerio*, *Strongylocentrotus purpuratus*, *Daphnia pulex*, *Pediculus humanus*, *Acyrtosiphon pisum* and *Nasonia vitripennis*.

### Author Contributions

Conceived and designed the experiments: VK. Performed the experiments: CE TU. Analyzed the data: VK CE TU. Contributed reagents/materials/analysis tools: VK. Wrote the paper: VK.

### References

- Rein T, DePamphilis ML, Zorbas H (1998) Identifying 5-methylcytosine and related modifications in DNA genomes. *Nucl Acids Res* 27: 2255–2264.
- Field LM, Lyko F, Mandrioli M, Pranter G (2004) DNA methylation in insects. *Insect Mol Biol* 13: 109–115.
- Goll MG, Bestor TH (2005) Eukaryotic cytosine methyltransferases. *Annu Rev Biochem* 74: 481–514.
- Colot V, Rossignol JL (1999) Eukaryotic DNA methylation as an evolutionary device. *Bioessays* 21: 402–411.
- Yoder JA, Walsh CP, Bestor TH (1997) Cytosine methylation and the ecology of intragenomic parasites. *Trends Genet* 13: 335–340.
- Walsh CP, Bestor TH (1999) Cytosine methylation and mammalian development. *Genes Dev* 13: 26–34.
- Bird AP (2002) DNA methylation patterns and epigenetic memory. *Genes Dev* 16: 6–21.
- Regev A, Lamb MJ, Jablonka E (1998) The Role of DNA Methylation in Invertebrates: Developmental Regulation or Genome Defense? *Mol Biol Evol* 15: 880–891.
- Simmen MW, Leight S, Charlton J, Jones SJ, Harris BR, et al. (1999) Non-methylated transposable elements and methylated genes in a chordate genome. *Science* 283: 1164–1167.
- Zilberman D, Gehring M, Tran RK, Ballinger T, Henikoff S (2007) Genome-wide analysis of Arabidopsis thaliana DNA methylation uncovers an interdependence between methylation and transcription. *Nature Genet* 39: 61–69.
- Phalke S, Nickel O, Walluscheck D, Hortic F, Onorati MC, et al. (2009) Retrotransposon silencing and telomere integrity in somatic cells of *Drosophila* depends on the cytosine-5 methyltransferase DNMT2. *Nat Genet* 41: 696–702.
- Mandrioli M, Volpi N (2003) The genome of the lepidopteran *Mamestra brassicae* has a vertebrate-like content of methyl-cytosine. *Genetica* 119: 187–191.
- Bird AP (1980) DNA methylation and the frequency of CpG in animal DNA. *Nucl Acids Res* 8: 1499–1504.
- Mazin AL (2009) Suicidal function of DNA methylation in age-related genome disintegration. *Ageing Res Rev*;doi:10.1016/j.arr.2009.04.005.
- Gregory TR (2009) Animal Genome Size Database. Available: <http://www.genomesize.com>. Accessed 2009 Aug 20.
- Grimaldi D, Engel MS (2005) The evolution of the insects. New York: Cambridge University Press. 755 p.
- Patel CV, Gopinathan KP (1987) Determination of trace amounts of 5-methylcytosine in DNA by reverse-phase high-performance liquid chromatography. *Anal Biochem* 164: 164–169.
- Wang Y, Jorda M, Jones PL, Maleszka R, Ling X, et al. (2006) Functional CpG methylation system in a social insect. *Science* 314: 645–647.
- REBASE. The Restriction Enzyme Database. Available: <http://rebase.neb.com/rebase/rebase.html>. Accessed 2009 Aug 20.
- Simmen MW (2008) Genome-scale relationships between cytosine methylation and dinucleotide abundances in animals. *Genomics* 92: 33–40.
- Whiting MF, Bradler S, Maxwell T (2003) Loss and recovery of wings in stick insects. *Nature* 421: 264–267.
- Mandrioli M, Borsatti F (2007) Analysis of heterochromatic epigenetic markers in the holocentric chromosomes of the aphid *Acyrtosiphon pisum*. *Chromosome Res* 15: 1015–1022.
- Tweedie S, Charlton J, Clark V, Bird A (1997) Methylation of genomes and genes at the invertebrate-vertebrate boundary. *Mol Cell Biol* 17: 1469–1475.
- Suzuki M, Bird A (2008) DNA methylation landscapes: provocative insights from epigenomics. *Nat Rev Genet* 9: 465–476.
- Warnecke PM, Stirzaker C, Song J, Grunau C, Melki JR, et al. (2002) Identification and resolution of artifacts in bisulfite sequencing. *Methods* 27: 101–107.
- Meissner A, Gnirke A, Bell GW, Ramsahoye BH, Lander ES, et al. (2005) Reduced representation bisulfite sequencing for comparative high-resolution DNA methylation analysis. *Nucl Acids Res* 33: 5868–5877.
- Lyko F, Ramsahoye BH, Jaenisch R (2000) DNA methylation in *Drosophila melanogaster*. *Nature* 408: 538–540.
- Deobagkar DN, Muralidharan K, Devare SG, Kalghatgi K, Chandra HS (1982) The mealybug chromosome system I: Unusual methylated bases and dinucleotides in DNA of *Planococcus* species. *J Biosci* 4: 513–526.
- Mohan KN, Chandra HS (2005) Isolation and analysis of sequences showing sex-specific cytosine methylation in the mealybug *Planococcus lilacinus*. *Mol Gen Genet* 274: 557–568.
- Ramsahoye BH, Biniszkiwicz D, Lyko F, Clark V, Bird AP, et al. (2000) *Proc Natl Acad Sci USA* 97: 5237–5242.
- Grandjean V, Yaman R, Cuzin F, Rassoulzadegan M (2007) Inheritance of an epigenetic mark: the CpG DNA methyltransferase 1 is required for de novo establishment of a complex pattern of non-CpG methylation. *PLoS ONE* 2: e1136. Available: <http://www.plosone.org/article/info:doi/10.1371/journal.pone.0001136>.
- Bird AP (1995) Gene number, noise reduction and biological complexity. *Trends Genet* 11: 94–100.
- Field LM (2000) Methylation and expression of amplified esterase genes in the aphid *Myzus persicae* (Sulzer). *Biochem J* 349: 863–868.

34. Hellman A, Chess A (2007) Gene body-specific methylation on the active X chromosome. *Science* 315: 1141–1143.
35. Ball MP, Li JB, Gao Y, Lee JH, LeProust EM, et al. (2009) Targeted and genome-scale strategies reveal gene-body methylation signatures in human cells. *Nat Biotechnol* 27: 361–368.
36. Suzuki M, Kerr AR, De Sousa D, Bird A (2007) CpG methylation is targeted to transcription units in an invertebrate genome. *Genome Res* 17: 625–631.
37. Zhang X, Yazaki J, Sundaresan A, Cokus S, Chan SW, et al. (2006) Genome-wide high-resolution mapping and functional analysis of DNA methylation in *Arabidopsis*. *Cell* 126: 1189–1201.
38. Bongiorno S, Prantera G (2003) Imprinted facultative heterochromatization in mealybugs. *Genetica* 117: 271–279.
39. Crooks GE, Hon G, Chandonia JM, Brenner SE (2004) WebLogo: a sequence logo generator. *Genome Res* 14: 1188–1190.
40. Krauss V, Thümmel C, Georgi F, Lehmann J, Stadler PF, et al. (2008) Near intron positions are reliable phylogenetic markers: an application to holometabolous insects. *Mol Biol Evol* 25: 821–830.
